# Supplementary material
Source: PubMed Central journal article supplement (PMC5445904)
Supplement: NIHMS853844-supplement.pdf [file NIHMS853844-supplement.pdf]

**Supplement for:**

Characterization of Acyl-CoA Synthetase Isoforms In Pancreatic Beta Cells: Gene Silencing Shows Participation of ACSL3 and ACSL4 In Insulin Secretion

Israr-ul H. Ansari<sup>a</sup>, Melissa J. Longacre<sup>a</sup>, Scott W. Stoker<sup>a</sup>, Mindy A. Kendrick<sup>a</sup>, Lucas M. O'Neill<sup>b</sup>, Laura J. Zitursky<sup>c</sup>, Luis A. Fernandez<sup>c</sup>, James M. Ntambi<sup>b</sup>, and Michael J. MacDonald<sup>a\*</sup>

<sup>a</sup>Childrens Diabetes Center, University of Wisconsin School of Medicine and Public Health, Madison, WI 53706; <sup>b</sup>Department of Biochemistry, University of Wisconsin, Madison, WI 53706; <sup>c</sup>Department of Transplant Research and Development, University of Wisconsin School of Medicine and Public Health, Madison, WI 53705

\*Address for correspondence and reprints: Michael J. MacDonald at

[mjmacdon@wisc.edu](mailto:mjmacdon@wisc.edu)

**Supplemental Table 1. Nucleotide sequences of shRNA used in this study.**

| Human               | Oligo name        | Sequence                                                                 |
|---------------------|-------------------|--------------------------------------------------------------------------|
| ACSL4 (NM_022977.2) | ACSL4-896-Top     | 5' GATCCGTGAATCGCAGAGTGAATATGTGCTTTATTCCTGCGATTCACTTTTTGGAAA 3'          |
|                     | ACSL1-896-bottom  | 5' AGCTTTTCCAAAAAGTGAATCGCAGAGTGAATAAAGCACATATTCCTGCGATTACG 3'           |
|                     | ACSL1-2011-Top    | 5' GATCCGCAAGAAGGCGGTTATACATGTGCTTTGTATAACCGCCTTCTTGCTTTTTGGAAA 3'       |
|                     | ACSL1-2011-bottom | 5' AGCTTTTCCAAAAAGCAAGAAGGCGGTTATACAAAGCACATGTATAACCGCCTTCTTGCG 3'       |
| ACSL3 (NM_004457.3) | ACSL3-1337-Top    | 5' GATCCTCGGAGTCATGATCTCACATATGTGCTTTATGTGAGATCATGACTCCTTTTTGGAAA_3'     |
|                     | ACSL3-1337-Bottom | 5' AGCTTTTCCAAAAAGGAGTCATGATCTCACATAAAGCACATATGTGAGATCATGACTCCGAG_3'     |
|                     | ACSL3-1560-Top    | 5' GATCCTCGGGATACATCCATGTTGAAACTGTGCTTGTTC AACATGGATGTATCCCTTTTTGGAAA_3' |
|                     | ACSL3-1560-Bottom | 5' AGCTTTTCCAAAAAGGATACATCCATGTTGAAACAAGCACAGTTTCAACATGGATGTATCCCGAG_3'  |

| Rat                 | Oligo name        | Sequence                                                                 |
|---------------------|-------------------|--------------------------------------------------------------------------|
| ACSL1 (NM_012820)   | ACSL1-697-Top     | 5' GATCCTCGGACTCCTACGACAATGATTGTGCTTATCATTGTCGTAGGAGTCCTTTTTGGAAA 3'     |
|                     | ACSL1-697-bottom  | 5' AGCTTTTCCAAAAAGGACTCCTACGACAATGATAAGCACAAATCATTGTCGTAGGAGTCCGAG 3'    |
|                     | ACSL1-816-Top     | 5' GATCCTCGCTGAAGATCTTGCGATAATTGTGCTTATTATCGCAAGATCTTCAGTTTTTTGGAAA 3'   |
|                     | ACSL1-816-bottom  | 5' AGCTTTTCCAAAAAAGTGAAGATCTTGCGATAATAAGCACAAATTCGCAAGATCTTCAGCGAG 3'    |
|                     | ACSL1-1292-Top    | 5' GATCCTCGGAAAGTCCGGCTGATGATTGTGCTTATCATCAGCCGGACTTTCTTTTTGGAAA 3'      |
|                     | ACSL1-1292-bottom | 5' AGCTTTTCCAAAAAGGAAAGTCCGGCTGATGATAAGCACAAATCATCAGCCGGACTTTCCGAG 3'    |
| ACSL3 (NM_057107.1) | ACSL3-666-Top     | 5' GATCCTCGGTGACCAACATCATTACTAGTGTGCTTCTAGTAATGATGTTGGTCACCTTTTTGGAAA 3' |
|                     | ACSL3-666-Bottom  | 5' AGCTTTTCCAAAAAGGTGACCAACATCATTACTAGAAGCACACTAGTAATGATGTTGGTCACCGAG 3' |
|                     | ACSL3-879-Top     | 5' GATCCTCGCCCTCAGATATTGCAGTAATTGTGCTTATTACTGCAATATCTGAGGGCTTTTTGGAAA 3' |
|                     | ACSL3-879-Bottom  | 5' AGCTTTTCCAAAAAGCCCTCAGATATTGCAGTAATAAGCACAAATCTGCAATATCTGAGGGCGAG 3'  |
|                     | ACSL3-1546-Top    | 5' GATCCTCCCATTAGTTTGTGTGAAATCTGTGCTTGATTTACAGCAAATAATGGTTTTTTGGAAA 3'   |
|                     | ACSL3-1546-Bottom | 5' AGCTTTTCCAAAAACCATTAGTTTGTGTGAAATCAAGCACAGATTTACAGCAAATAATGGGAG 3'    |
| ACSL4 (NM_053623)   | ACSL4-645-Top     | 5' GATCCTCGAGTCTGAGGCTTCTATCTTGTGCTTAGATAGGAAGCCTCAGACTCTTTTTGGAAA 3'    |

|                     |                   |                                                                          |
|---------------------|-------------------|--------------------------------------------------------------------------|
|                     | ACSL4-645-bottom  | 5' AGCTTTTCCAAAAAGAGTCTGAGGCTTCCTATCTAAGCACAAGATAGGAAGCCTCAGACTCGAG 3'   |
|                     | ACSL4-2201-Top    | 5' GATCCTCGGCAACTGTCTACTTCACATTGTGCTTATGTGAAGTAGACAGTTGCCTTTTTGGAAA 3'   |
|                     | ACSL4-2201-bottom | 5' AGCTTTTCCAAAAAGGCAACTGTCTACTTCACATAAGCACAATGTGAAGTAGACAGTTGCCGAG 3'   |
|                     | ACSL4-3430-Top    | 5' GATCCTCGTGCAGTAACTTGGGAGTGTTGTGCTTACACTCCCAAGTTACTGCACTTTTTGGAAA 3'   |
|                     | ACSL4-3430-bottom | 5' AGCTTTTCCAAAAAGTGCAGTAACTTGGGAGTGTAAAGCACAACACTCCCAAGTTACTGCACGAG 3'  |
| ACSL5 (NM_053607)   | ACSL5-392-Top     | 5' GATCCTCGACCTTGCTTGGGATACAGATGTGCTTTCTGTATCCCAAGCAAGGTCTTTTTGGAAA 3'   |
|                     | ACSL5-392-bottom  | 5' AGCTTTTCCAAAAAGACCTTGCTTGGGATACAGAAAGCACATCTGTATCCCAAGCAAGGTGCGAG 3'  |
|                     | ACSL5-916-Top     | 5' GATCCTCGGTGACCCCAAAGGAGCTATTGTGCTTATAGCTCCTTTGGGGTCACCTTTTTGGAAA 3'   |
|                     | ACSL5-916-bottom  | 5' AGCTTTTCCAAAAAGGTGACCCCAAAGGAGCTATAAGCACAATAGCTCCTTTGGGGTCACCGAG 3'   |
|                     | ACSL5-1351-Top    | 5' GATCCTCGGGAAGGTTTCGTCTCATGATTGTGCTTATCATGAGACGAACCTTCCCTTTTTGGAAA 3'  |
|                     | ACSL5-1351-bottom | 5' AGCTTTTCCAAAAAGGGAAGGTTTCGTCTCATGATAAGCACAATCATGAGACGAACCTTCCCGAG 3'  |
| ACSL6 (NM_130739.1) | ACSL6-436-Top     | 5' GATCCTCGCTTAGCATCTCAGGGAATGGTGTGCTTCCATTCCCTGAGATGCTAAGCTTTTTGGAAA 3' |
|                     | ACSL6-436-Bottom  | 5' AGCTTTTCCAAAAAGCTTAGCATCTCAGGGAATGGAAGCACACCATTCCCTGAGATGCTAAGCGAG 3' |
|                     | ACSL6-1243-Top    | 5' GATCCTCGCTGCTGAATCGGATGTATGATGTGCTTTCATACATCCGATTCAGCAGCTTTTTGGAAA 3' |
|                     | ACSL6-1243-Bottom | 5' AGCTTTTCCAAAAAGCTGCTGAATCGGATGTATGAAAGCACATCATACATCCGATTCAGCAGCGAG 3' |
|                     | ACSL6-1848-Top    | 5' GATCCTCCCGAGAAGATTGAGAACATCTTGTGCTTAGATGTTCTCAATCTTCTCGGTTTTGGAAA 3'  |
|                     | ACSL6-1848-Bottom | 5' AGCTTTTCCAAAAACCGAGAAGATTGAGAACATCTAAGCACAAGATGTTCTCAATCTTCTCGGGAG 3' |

**Supplemental Table 2. Nucleotide sequences of real time RT-PCR primers used in this study.**

|                | <b>Primer name</b> |                                |
|----------------|--------------------|--------------------------------|
| <b>Gene ID</b> | <b>Human</b>       | <b>Sequence</b>                |
| NM_001995.2    | ACSL1-For          | 5' AGCTGGTTGACTTCCGACAG 3'     |
|                | ACSL1-Rev          | 5' GTGAGTGCTGCAAAAGCTCC 3'     |
| NM_004457.3    | ACSL3-For          | 5' TGTTGATGGAAAGCCACCGAC 3'    |
|                | ACSL3-Rev          | 5' GTTTTCCATGCTGGCCTTGG 3'     |
| NM_022977.2    | ACSL4-For          | 5' AAGTAGACCAACGCCTTCAG 3'     |
|                | ACSL4-Rev          | 5' GTCCCAGTCCAGGTATTCTTTC 3'   |
| NM_016234.3    | ACSL5-For          | 5' CTGAAGCCACCCTGTCTCTG 3'     |
|                | ACSL5-Rev          | 5' TTCTTCCTGCCACACGAGTC 3'     |
| NM_001205248.1 | ACSL6-For          | 5' GAAGATGCAGACACAGGAGATC 3'   |
|                | ACSL6-Rev          | 5' TGAACCAGTAGGCAAGGATG 3'     |
| NM_005271.3    | Glut1-For          | 5' CAAATCCAACGCACCCAGAG 3'     |
|                | Glut1-Rev          | 5' CTGTCACTCCTCCAGCATTCAAG 3'  |
|                | <b>Rat</b>         |                                |
| NM_012820      | ACSL1-For          | 5' TCAGAGCAGTTCATCGGCATC 3'    |
|                | ACSL1-Rev          | 5' CGGTTCCAAGCGTGCATAGAG 3'    |
| NM_057107.1    | ACSL3-For          | 5' TCTGCTTCTGTTGTCCCGTTG 3'    |
|                | ACSL3-Rev          | 5' AACTAATGGTGCTCCCACTCTGCC 3' |
| NM_053623      | ACSL4-For          | 5' TGAATGTCTGCTTCTGCTGC 3'     |
|                | ACSL4-Rev          | 5' CCAACTCTCCAGTAGTGTAGTCGG 3' |
| NM_053607      | ACSL5-For          | 5' TGCCTCCTGACATTTGGAACG 3'    |
|                | ACSL5-Rev          | 5' CCCTCAATCCCTACAGACTGGTTG 3' |
| NM_130739.1    | ACSL6-For          | 5' CATCATCAATACAGCGGACATCTG 3' |
|                | ACSL6-Rev          | 5' CTCAGGGCATCGTCAAATGG 3'     |
| NM_008133.4    | Glut1-For          | 5' AACTACCACTTGCTCATGTCTG 3'   |
|                | Glut1-Rev          | 5' TTCTCAGATGCACCCGATATCC 3'   |
